# Supplementary material for: Simulating single-photon detector array sensors for depth imaging
Source: Research Square preprint supplement (doi:10.21203/rs.3.rs-2238499/v1), 2022-11-12
Supplement: Supplementary file [file 23575abd3cb22d45c66baf7c.pdf]

# Simulating single-photon detector array sensors for depth imaging : supplemental document

## 1 Derivation of photons detected per-pulse-per-pixel

The number of photons returned from a target is described by a photon channel which models the loss of signal photons as a series of sequential processes. Consider a laser pulse of initial energy  $E_0$  having a divergence  $\theta$  projected over a range  $R$ , through an atmosphere of attenuation length  $C_{atm}$ . The energy density  $\rho_E$  at the target is,

$$\rho_E = \frac{E_0 e^{\frac{-R}{C_{atm}}}}{\pi R^2 \tan^2(\theta)}. \quad (1)$$

For an imaging sensor with pixels of effective size  $W_p \times H_p$  at the focal plane of a collecting lens of focal length  $f$  and f-number  $f_{no}$ , the energy  $E_1$  available to each pixel is,

$$E_1 = \rho_E \left( \frac{R^2 W_p H_p}{f^2} \right). \quad (2)$$

Assuming Lambertian reflection, for a target of reflectivity  $\Gamma$  the scattered energy  $E_2$  which arrives at the aperture of the lens for each pixel is,

$$E_2 = \frac{\Gamma E_1 e^{\frac{-R}{C_{atm}}}}{2\pi R^2}. \quad (3)$$

Each pixel then captures a fraction of this scattered energy according to the aperture of the lens and the quantum efficiency  $q$  of the detector,

$$E_3 = q E_2 \pi \left( \frac{f}{2f_{no}} \right)^2. \quad (4)$$

Combining Eqs. 1-4 and dividing by  $\frac{hc}{\lambda}$  where  $\lambda$  is the wavelength of the illuminating light, the number of photons-per-pulse  $P_{pp}$  captured by the detector is,

$$P_{pp} = \frac{\lambda E_0}{hc} \frac{q \Gamma e^{\frac{-2R}{C_{atm}}}}{8} \frac{W_p H_p}{f_{no}^2 \pi R^2 \tan^2(\theta)}. \quad (5)$$

## 2 Experimental parameters used in simulating the resolution test target

| Symbol     | Parameter                 | Value | Unit    |
|------------|---------------------------|-------|---------|
| $E_0$      | Energy per pulse          | 1     | nJ      |
| $\nu$      | Repetition rate           | 2.25  | MHz     |
| $\lambda$  | Wavelength                | 671   | nm      |
| $\sigma'$  | Pulse FWHM                | 600   | ps      |
| $R$        | Range                     | 14.73 | m       |
| $C_{atm}$  | Attenuation               | 6.2   | km      |
| $\theta$   | Divergence                | 0.02  | radians |
| $\Gamma$   | Reflectivity              | 0.09  | —       |
| $C_{bckg}$ | Solar background          | 0     | W       |
| $f_{no}$   | f-number                  | 2.0   | -       |
| $C_{dc}$   | Dark counts               | 126   | Hz      |
| $\eta$     | Exposure time             | 1000  | $\mu s$ |
| $q$        | Quantum efficiency        | 0.26  | —       |
| $W_p/H_p$  | Pixel size (width/height) | 9.2   | $\mu m$ |
| $\omega$   | Bin width                 | 50    | ps      |
| $j$        | Jitter                    | 200   | ps      |

Table 1: The parameters used to model the resolution test target. Note that the target was effectively normal to all pixels and so a constant reflectivity value was used.

## 3 Match filtering as an unbiased estimator

Consider a single Gaussian signal on top of a uniform background  $g(t)$  match filtered with a Gaussian kernel  $f(t)$ . The depth estimate  $\hat{\mu}$  is then given by,

$$\hat{\mu} = \operatorname{argmax}[f(t) * g(t)], \quad (6)$$

where

$$\begin{aligned} f(t) &= \frac{1}{\sigma' \sqrt{2\pi}} \exp \left[ -\frac{1}{2} \left( \frac{t - \mu}{\sigma'} \right)^2 \right], \\ g(t) &= \frac{1}{\sigma' \sqrt{2\pi}} \exp \left[ -\frac{1}{2} \left( \frac{t - \mu'}{\sigma'} \right)^2 \right] + \operatorname{Arect} \left[ \frac{t - \mu'}{T} \right], \end{aligned} \quad (7)$$

Formally, the background is treated as a uniform value of amplitude  $A$  over the time domain  $T$  centered upon the true depth value  $\mu'$ . Under the conditions

that the signal  $g(t)$  contains only a single peak that is situated sufficiently far (i.e.  $\gg 3\sigma'$ ) from the boundaries of the domain of  $t$ , then Eq. 6 is equivalent to,

$$\max[f(t) * g(t)]. \quad (8)$$

Thus,

$$\begin{aligned} \max[f(t) * g(t)] &= \max \left[ \int_{-\infty}^{\infty} f(t)g(t)dt \right], \\ \max[f(t) * g(t)] &= \max \left\{ B \exp \left[ -\frac{1}{2} \left( \frac{\mu - \mu'}{\sigma'} \right)^2 \right] + \int_{-\infty}^{\infty} f(t) \text{rect} \left[ \frac{t - \mu'}{T} \right] dt \right\}. \end{aligned} \quad (9)$$

Here  $B$  is a normalization constant. Equation 9 implies that under the prior stated conditions,

$$\int_{-\infty}^{\infty} f(t) \text{rect} \left[ \frac{t - \mu'}{T} \right] dt = C \implies \max[f(t) * g(t)] \iff \mu = \mu' \quad (10)$$

$$\hat{\mu} = \mu = \mu'$$

where  $C$  is an integration constant. Hence, Eq. 10 implies that match filtering by a Gaussian kernel is an unbiased estimator for the case of a single Gaussian signal on a uniform background.

Further, in the case of a Gaussian signal, in the absence of background ( $A = 0$ ), the minimum variance unbiased estimator (i.e. the estimator which saturates the Cramér-Rao bound) is given by the maximum likelihood [1]. This operation is equivalent to Eq. 6 with a kernel  $h(t) = \log[f(t)]$ . However, for  $A \neq 0$ ,  $h(t)$  is biased towards the center of the domain  $T$  and as such is no longer consistent with the conditions for the Cramér-Rao bound. Consider the kernel  $f(t)$  then,

$$\log[A + f(t)] = \log(A) + \frac{f(t)}{A} + o\left(\frac{f(t)}{A}\right) \quad (11)$$

Here  $o()$  represents the higher order terms in the Taylor series. Hence, as  $A$  (i.e. the amplitude of background) increase, the contribution of these terms diminishes. Hence

$$\log[A + f(t)] \propto D + \frac{f(t)}{A} \quad (12)$$

Specifically,  $D$  is a constant only tied to the amplitude of the background while the form of the kernel  $f(t)$  remains unchanged. Consequently,  $f(t)$  represents an operation analogous to the maximum likelihood for cases with  $A \neq 0$ .

## 4 Experimental parameters used in simulating the landrover

| Symbol     | Parameter                   | Value | Unit          |
|------------|-----------------------------|-------|---------------|
| $E_0$      | Energy per pulse            | 14    | $\mu\text{J}$ |
| $\nu$      | Repetition rate             | 33    | kHz           |
| $\lambda$  | Wavelength                  | 532   | nm            |
| $\sigma'$  | Pulse FWHM                  | 3.5   | ns            |
| $R$        | Range                       | 1.4   | km            |
| $C_{atm}$  | Attenuation                 | 6.2   | km            |
| $\theta$   | Divergence                  | 1.07  | milliradian   |
| $\Gamma$   | Body reflectivity           | 0.065 | —             |
|            | Tyres and trim reflectivity | 0.029 | —             |
|            | Wall reflectivity           | 0.081 | —             |
|            | Ground reflectivity         | 0.066 | —             |
|            | Seats reflectivity          | 0.04  | —             |
|            | Heatlights reflectivity     | 0.25  | —             |
|            | Numberplate reflectivity    | 0.8   | —             |
| $C_{bckg}$ | Solar background            | 0.5   | W             |
| $f_{no}$   | f-number                    | 10.0  | -             |
| $C_{dc}$   | Dark counts                 | 126   | Hz            |
| $\eta$     | Exposure time               | 83    | $\mu\text{s}$ |
| $q$        | Quantum efficiency          | 0.26  | —             |
| $W_p/H_p$  | Pixel size                  | 9.2   | $\mu\text{m}$ |
| $\omega$   | Bin width                   | 50    | ps            |
| $j$        | Jitter                      | 1.5   | ns            |

Table 2: The parameters used to model the Landrover. Note that the reflectivities represent the base values prior to their modification based on the orientation of the surface relative to the camera.

## References

- [1] H. Cramer, “Mathematical methods of statistics, princeton univ,” *Press, Princeton, NJ*, 1946.
